# Supplementary material for: The 10-Year Cost-Effectiveness of Lifestyle Intervention or Metformin for Diabetes Prevention
Source: Oxford University Press journal article supplement (doi:10.2337/dc11-1468), 2012-03-13
Supplement: dc111468supplementarydata.pdf [file dc111468supplementarydata.pdf]

SUPPLEMENTARY DATA

**Supplementary Table 1.** Detailed resource utilization and cost of interventions by treatment year

a. Placebo

| Activity/resource                    | Number of subjects | Percent = no. of units * % of subjects | Cost per unit (\$) | Time (hours) | Cost per subject (\$) |
|--------------------------------------|--------------------|----------------------------------------|--------------------|--------------|-----------------------|
| <b>Baseline</b>                      | 1,082              |                                        |                    |              |                       |
| <b>Year 1 (DPP Year 1)</b>           | 1,082              |                                        |                    |              |                       |
| 1st visit counseling                 |                    | 100%                                   | 32.00              | 0.50         | 16.00                 |
| 3 month visit counseling (nurse)     |                    | 100%                                   | 32.00              | 0.25         | 8.00                  |
| 3 month visit counseling (dietitian) |                    | 12%                                    | 33.23              | 0.63         | 2.51                  |
| Phone calls                          |                    | 10%                                    | 32.00              | 0.16         | 0.51                  |
| Reminder calls                       |                    | 200%                                   | 24.77              | 0.08         | 3.96                  |
| 1st visit materials                  |                    |                                        |                    |              |                       |
| <i>On your way to fitness</i>        |                    | 100%                                   | 1.27               |              | 1.27                  |
| <i>Dietary Guide for Americans</i>   |                    | 75%                                    | 1.47               |              | 1.10                  |
| Fasting glucose                      |                    | 96%                                    | 5.62               |              | 5.42                  |
| OGTT                                 |                    | 96%                                    | 18.44              |              | 17.78                 |
| Venipuncture                         |                    | 289%                                   | 3.00               |              | 8.68                  |
| Overhead (69% of personnel)          |                    |                                        |                    |              | 21.38                 |
| Total Year 1                         |                    |                                        |                    |              | 86.61                 |
|                                      |                    |                                        |                    |              |                       |
|                                      |                    |                                        |                    |              |                       |
| <b>Year 2 (DPP Year 2)</b>           | 1,044              |                                        |                    |              |                       |
| Annual visit                         |                    | 100%                                   | 32.00              | 0.33         | 10.56                 |
| Phone calls                          |                    | 10%                                    | 32.00              | 0.16         | 0.51                  |
| Reminder calls                       |                    | 100%                                   | 24.77              | 0.08         | 1.98                  |
| Fasting glucose                      |                    | 85%                                    | 5.62               |              | 4.79                  |
| OGTT                                 |                    | 85%                                    | 18.44              |              | 15.70                 |
| Venipuncture                         |                    | 255%                                   | 3.00               |              | 7.66                  |
| Overhead (69% of personnel)          |                    |                                        |                    |              | 9.01                  |
| Total Year 2                         |                    |                                        |                    |              | 50.21                 |
|                                      |                    |                                        |                    |              |                       |
|                                      |                    |                                        |                    |              |                       |
| <b>Year 3 (DPP Year 3)</b>           | 1,027              |                                        |                    |              |                       |
| Annual visit                         |                    | 100%                                   | 32.00              | 0.33         | 10.56                 |
| Phone calls                          |                    | 10%                                    | 32.00              | 0.16         | 0.51                  |
| Reminder calls                       |                    | 100%                                   | 24.77              | 0.08         | 1.98                  |
| Fasting glucose                      |                    | 75%                                    | 5.62               |              | 4.22                  |
| OGTT                                 |                    | 75%                                    | 18.44              |              | 13.86                 |
| Venipuncture                         |                    | 226%                                   | 3.00               |              | 6.77                  |
| Overhead (69% of personnel)          |                    |                                        |                    |              | 9.01                  |
| Total Year 3                         |                    |                                        |                    |              | 46.91                 |

SUPPLEMENTARY DATA

|                                  |     |       |       |      |        |
|----------------------------------|-----|-------|-------|------|--------|
|                                  |     |       |       |      |        |
| <b>Year 4 (Bridge)</b>           | 990 |       |       |      |        |
| Closure visit                    |     | 100%  | 30.43 | 1.00 | 30.43  |
| Reminder call for closure visit  |     | 100%  | 24.77 | 0.08 | 1.98   |
| Group lifestyle intervention     |     | 461%  | 9.13  | 1.00 | 42.05  |
| Reminder calls                   |     | 1600% | 24.77 | 0.08 | 31.71  |
| Phone calls                      |     | 150%  | 32.00 | 0.16 | 7.68   |
| Course materials                 |     | 47%   | 11.41 |      | 5.36   |
| Fasting glucose                  |     | 69%   | 5.62  |      | 3.85   |
| OGTT                             |     | 69%   | 18.44 |      | 12.65  |
| Venipuncture                     |     | 206%  | 3.00  |      | 6.17   |
| Overhead (69% of personnel)      |     |       |       |      | 78.56  |
| Total Year 4                     |     |       |       |      | 220.44 |
|                                  |     |       |       |      |        |
| <b>Year 5 (DPPOS Year 1)</b>     | 946 |       |       |      |        |
| Healthy Lifestyle Program (HELP) |     | 65%   | 13.29 | 1.00 | 8.68   |
| Reminder calls                   |     | 400%  | 24.77 | 0.08 | 7.93   |
| Phone calls                      |     | 150%  | 32.00 | 0.16 | 7.68   |
| Fasting glucose                  |     | 64%   | 5.62  |      | 3.59   |
| OGTT                             |     | 64%   | 18.44 |      | 11.79  |
| Venipuncture                     |     | 192%  | 3.00  |      | 5.76   |
| Overhead (69% of personnel)      |     |       |       |      | 16.76  |
| Total Year 5                     |     |       |       |      | 62.18  |
|                                  |     |       |       |      |        |
| <b>Year 6 (DPPOS Year 2)</b>     | 923 |       |       |      |        |
| Healthy Lifestyle Program (HELP) |     | 68%   | 12.43 | 1.00 | 8.45   |
| Reminder calls (4 pp*N)          |     | 400%  | 24.77 | 0.08 | 7.93   |
| Phone calls                      |     | 150%  | 32.00 | 0.16 | 7.68   |
| Fasting glucose                  |     | 61%   | 5.62  |      | 3.45   |
| OGTT                             |     | 61%   | 18.44 |      | 11.33  |
| Venipuncture                     |     | 184%  | 3.00  |      | 5.53   |
| Overhead (69% of personnel)      |     |       |       |      | 16.60  |
| Total Year 6                     |     |       |       |      | 60.97  |
|                                  |     |       |       |      |        |
| <b>Year 7 (DPPOS Year 3)</b>     | 903 |       |       |      |        |
| Healthy Lifestyle Program (HELP) |     | 67%   | 11.98 | 1.00 | 8.06   |
| Reminder calls                   |     | 400%  | 24.77 | 0.08 | 7.93   |
| Phone calls                      |     | 150%  | 32.00 | 0.16 | 7.68   |
| Fasting glucose                  |     | 58%   | 5.62  |      | 3.26   |
| OGTT                             |     | 58%   | 18.44 |      | 10.70  |
| Venipuncture                     |     | 174%  | 3.00  |      | 5.22   |
| Overhead (69% of personnel)      |     |       |       |      | 16.33  |
| Total Year 7                     |     |       |       |      | 59.18  |

SUPPLEMENTARY DATA

|                                  |     |      |       |      |        |
|----------------------------------|-----|------|-------|------|--------|
|                                  |     |      |       |      |        |
| <b>Year 8 (DPPOS Year 4)</b>     | 892 |      |       |      |        |
| Healthy Lifestyle Program (HELP) |     | 52%  | 11.85 | 1.00 | 6.10   |
| Reminder calls                   |     | 400% | 24.77 | 0.08 | 7.93   |
| Phone calls                      |     | 150% | 32.00 | 0.16 | 7.68   |
| Fasting glucose                  |     | 55%  | 5.62  |      | 3.09   |
| OGTT                             |     | 55%  | 18.44 |      | 10.15  |
| Venipuncture                     |     | 165% | 3.00  |      | 4.95   |
| Overhead (69% of personnel)      |     |      |       |      | 14.98  |
| Total Year 8                     |     |      |       |      | 54.89  |
|                                  |     |      |       |      |        |
| <b>Year 9 (DPPOS Year 5)</b>     | 874 |      |       |      |        |
| Healthy Lifestyle Program (HELP) |     | 59%  | 12.14 | 1.00 | 7.10   |
| Reminder calls                   |     | 400% | 24.77 | 0.08 | 7.93   |
| Phone calls                      |     | 150% | 32.00 | 0.16 | 7.68   |
| Fasting glucose                  |     | 52%  | 5.62  |      | 2.90   |
| OGTT                             |     | 52%  | 18.44 |      | 9.52   |
| Venipuncture                     |     | 155% | 3.00  |      | 4.64   |
| Overhead (69% of personnel)      |     |      |       |      | 15.67  |
| Total Year 9                     |     |      |       |      | 55.44  |
|                                  |     |      |       |      |        |
| <b>Year 10 (DPPOS Year 6)</b>    | 855 |      |       |      |        |
| Healthy Lifestyle Program (HELP) |     | 52%  | 14.50 | 1.00 | 7.48   |
| Reminder calls                   |     | 400% | 24.77 | 0.08 | 7.93   |
| Phone calls                      |     | 150% | 32.00 | 0.16 | 7.68   |
| Fasting glucose                  |     | 49%  | 5.62  |      | 2.73   |
| OGTT                             |     | 49%  | 18.44 |      | 8.97   |
| Venipuncture                     |     | 146% | 3.00  |      | 4.38   |
| Overhead (69% of personnel)      |     |      |       |      | 15.93  |
| Total Year 10                    |     |      |       |      | 55.10  |
|                                  |     |      |       |      |        |
| Total Years 1-10                 |     |      |       |      | 751.94 |



SUPPLEMENTARY DATA

|                                        |       |      |        |      |        |
|----------------------------------------|-------|------|--------|------|--------|
| Reminder calls                         |       | 404% | 24.77  | 0.08 | 8.01   |
| Laboratory tests:                      |       |      |        |      |        |
| Serum creatinine                       |       | 84%  | 7.34   |      | 6.17   |
| Hemoglobin/hematocrit                  |       | 84%  | 6.78   |      | 5.70   |
| Urine creatinine                       |       | 0.4% | 7.41   |      | 0.03   |
| Fasting glucose                        |       | 91%  | 5.62   |      | 5.09   |
| OGTT                                   |       | 91%  | 18.44  |      | 16.71  |
| Venipuncture                           |       | 272% | 3.00   |      | 8.15   |
| Metformin                              |       |      |        |      |        |
| 0 tablet dose                          |       | 16%  | 0.00   |      | 0.00   |
| 1 tablet dose                          |       | 14%  | 54.75  |      | 7.67   |
| 2 tablet dose                          |       | 70%  | 109.50 |      | 76.65  |
| Toolbox                                |       | 100% | 17.00  |      | 17.00  |
| Overhead (69% of personnel)            |       |      |        |      | 52.62  |
| Total Year 2                           |       |      |        |      | 294.10 |
|                                        |       |      |        |      |        |
| <b>Year 3 (DPP Year 3)</b>             | 1,012 |      |        |      |        |
| Standard lifestyle intervention        |       |      |        |      |        |
| (Placebo (Table S1a) excluding labs)   |       | 100% | 22.06  |      | 22.06  |
| Follow-up visits: medication case mgr. |       | 397% | 32.00  | 0.33 | 41.92  |
| medical assistant                      |       | 246% | 23.00  | 0.33 | 18.68  |
| Dose-titration/restart visits          |       | 7%   | 32.00  | 0.33 | 0.74   |
| Phone calls                            |       | 135% | 32.00  | 0.16 | 6.91   |
| Reminder phone calls                   |       | 404% | 24.77  | 0.08 | 8.01   |
| Laboratory tests:                      |       |      |        |      |        |
| Serum creatinine                       |       | 80%  | 7.34   |      | 5.87   |
| Hemoglobin/hematocrit                  |       | 80%  | 6.78   |      | 5.42   |
| Urine creatinine                       |       | 0.4% | 7.41   |      | 0.03   |
| Fasting glucose                        |       | 83%  | 5.62   |      | 4.65   |
| OGTT                                   |       | 83%  | 18.44  |      | 15.25  |
| Venipuncture                           |       | 248% | 3.00   |      | 7.44   |
| Metformin                              |       |      |        |      |        |
| 0 tablet dose                          |       | 20%  | 0.00   |      | 0.00   |
| 1 tablet dose                          |       | 12%  | 54.75  |      | 6.57   |
| 2 tablet dose                          |       | 68%  | 109.50 |      | 74.46  |
| Toolbox                                |       | 100% | 27.89  |      | 27.89  |
| Overhead (69% of personnel)            |       |      |        |      | 52.62  |
| Total Year 3                           |       |      |        |      | 298.53 |
|                                        |       |      |        |      |        |
| <b>Year 4 (Bridge)</b>                 | 983   |      |        |      |        |
| Closure visit                          |       | 100% | 30.43  | 1.00 | 30.43  |
| Reminder call for closure visit        |       | 100% | 24.77  | 0.08 | 1.98   |

SUPPLEMENTARY DATA

|                                  |     |       |        |      |        |
|----------------------------------|-----|-------|--------|------|--------|
| Group lifestyle intervention     |     | 465%  | 9.13   | 1.00 | 42.48  |
| Reminder calls                   |     | 1600% | 24.77  | 0.08 | 31.71  |
| Course materials (462 total)     |     | 47%   | 11.41  |      | 5.36   |
| Phone calls                      |     | 150%  | 32.00  | 0.16 | 7.68   |
| Fasting glucose                  |     | 75%   | 5.62   |      | 4.21   |
| OGTT                             |     | 75%   | 18.44  |      | 13.81  |
| Venipuncture                     |     | 225%  | 3.00   |      | 6.74   |
| Safety monitoring                |     | 59%   | 22.82  |      | 13.44  |
| Metformin                        |     | 59%   | 109.50 |      | 64.50  |
| Overhead (69% of personnel)      |     |       |        |      | 78.85  |
| Total Year 4                     |     |       |        |      | 301.18 |
| <b>Year 5 (DPPOS Year 1)</b>     | 941 |       |        |      |        |
| Healthy Lifestyle Program (HELP) |     | 66%   | 13.29  | 1.00 | 8.82   |
| Reminder calls                   |     | 400%  | 24.77  | 0.08 | 7.93   |
| Phone calls                      |     | 150%  | 32.00  | 0.16 | 7.68   |
| Fasting glucose                  |     | 70%   | 5.62   |      | 3.96   |
| OGTT                             |     | 70%   | 18.44  |      | 12.99  |
| Venipuncture                     |     | 211%  | 3.00   |      | 6.34   |
| Safety monitoring                |     | 55%   | 22.82  |      | 12.60  |
| Metformin                        |     | 55%   | 109.50 |      | 60.44  |
| Overhead (69% of personnel)      |     |       |        |      | 16.86  |
| Total Year 5                     |     |       |        |      | 137.62 |
| <b>Year 6 (DPPOS Year 2)</b>     | 906 |       |        |      |        |
| Healthy Lifestyle Program (HELP) |     | 66%   | 12.43  | 1.00 | 8.17   |
| Reminder calls                   |     | 400%  | 24.77  | 0.08 | 7.93   |
| Phone calls                      |     | 150%  | 32.00  | 0.16 | 7.68   |
| Fasting glucose                  |     | 68%   | 5.62   |      | 3.84   |
| OGTT                             |     | 68%   | 18.44  |      | 12.60  |
| Venipuncture                     |     | 205%  | 3.00   |      | 6.15   |
| Safety monitoring                |     | 55%   | 22.82  |      | 12.57  |
| Metformin                        |     | 55%   | 109.50 |      | 60.33  |
| Overhead (69% of personnel)      |     |       |        |      | 16.40  |
| Total Year 6                     |     |       |        |      | 135.67 |
| <b>Year 7 (DPPOS Year 3)</b>     | 890 |       |        |      |        |
| Healthy Lifestyle Program (HELP) |     | 68%   | 11.98  | 1.00 | 8.13   |
| Reminder calls                   |     | 400%  | 24.77  | 0.08 | 7.93   |
| Phone calls                      |     | 150%  | 32.00  | 0.16 | 7.68   |
| Fasting glucose                  |     | 65%   | 5.62   |      | 3.64   |
| OGTT                             |     | 65%   | 18.44  |      | 11.93  |
| Venipuncture                     |     | 194%  | 3.00   |      | 5.82   |
| Safety monitoring                |     | 57%   | 22.82  |      | 13.10  |

SUPPLEMENTARY DATA

|                                  |     |      |        |      |          |
|----------------------------------|-----|------|--------|------|----------|
| Metformin                        |     | 57%  | 109.50 |      | 62.85    |
| Overhead (69% of personnel)      |     |      |        |      | 16.38    |
| Total Year 7                     |     |      |        |      | 137.47   |
| <b>Year 8 (DPPOS Year 4)</b>     | 877 |      |        |      |          |
| Healthy Lifestyle Program (HELP) |     | 54%  | 11.85  | 1.00 | 6.40     |
| Reminder calls                   |     | 400% | 24.77  | 0.08 | 7.93     |
| Phone calls                      |     | 150% | 32.00  | 0.16 | 7.68     |
| Fasting glucose                  |     | 61%  | 5.62   |      | 3.43     |
| OGTT                             |     | 61%  | 18.44  |      | 11.27    |
| Venipuncture                     |     | 183% | 3.00   |      | 5.50     |
| Safety monitoring                |     | 56%  | 22.82  |      | 12.80    |
| Metformin                        |     | 56%  | 109.50 |      | 61.43    |
| Overhead (69% of personnel)      |     |      |        |      | 15.18    |
| Total Year 8                     |     |      |        |      | 131.63   |
| <b>Year 9 (DPPOS Year 5)</b>     | 863 |      |        |      |          |
| Healthy Lifestyle Program (HELP) |     | 60%  | 12.14  | 1.00 | 7.33     |
| Reminder calls                   |     | 400% | 24.77  | 0.08 | 7.93     |
| Phone calls                      |     | 150% | 32.00  | 0.16 | 7.68     |
| Fasting glucose                  |     | 58%  | 5.62   |      | 3.26     |
| OGTT                             |     | 58%  | 18.44  |      | 10.68    |
| Venipuncture                     |     | 174% | 3.00   |      | 5.21     |
| Safety monitoring                |     | 55%  | 22.82  |      | 12.53    |
| Metformin                        |     | 55%  | 109.50 |      | 60.12    |
| Overhead (69% of personnel)      |     |      |        |      | 15.83    |
| Total Year 9                     |     |      |        |      | 130.56   |
| <b>Year 10 (DPPOS Year 6)</b>    | 843 |      |        |      |          |
| Healthy Lifestyle Program (HELP) |     | 56%  | 14.50  | 1.00 | 8.05     |
| Reminder calls                   |     | 400% | 24.77  | 0.08 | 7.93     |
| Phone calls (1.5*N)              |     | 150% | 32.00  | 0.16 | 7.68     |
| Fasting glucose                  |     | 55%  | 5.62   |      | 3.11     |
| OGTT                             |     | 55%  | 18.44  |      | 10.19    |
| Venipuncture                     |     | 166% | 3.00   |      | 4.98     |
| Safety monitoring                |     | 55%  | 22.82  |      | 12.46    |
| Metformin                        |     | 55%  | 109.50 |      | 59.79    |
| Overhead (69% of personnel)      |     |      |        |      | 16.32    |
| Total Year 10                    |     |      |        |      | 130.50   |
|                                  |     |      |        |      |          |
| <b>Total Years 1-10</b>          |     |      |        |      | 2,281.15 |

SUPPLEMENTARY DATA

c. Lifestyle

| Activity/resource                 | Number of subjects | Percent = no. of units * % of subjects | Cost per unit (\$) | Time (hours) | Cost per subject (\$) |
|-----------------------------------|--------------------|----------------------------------------|--------------------|--------------|-----------------------|
| <b>Baseline</b>                   | 1,079              |                                        |                    |              |                       |
| <b>Year 1 (DPP Year 1)</b>        | 1,079              |                                        |                    |              |                       |
| Baseline history and physical     |                    | 100%                                   | 135.15             | 1.00         | 135.15                |
| Core curriculum                   |                    | 1,600%                                 | 29.86              | 1.00         | 477.76                |
| Exercise test                     |                    | 256%                                   | 29.86              | 1.00         | 76.50                 |
| Supervised activity: care manager |                    | 171%                                   | 32.99              | 1.00         | 56.35                 |
| exercise trainer                  |                    | 36%                                    | 29.86              | 1.25         | 13.44                 |
| Lifestyle group sessions          |                    | 765%                                   | 29.86              | 0.58         | 132.49                |
| In-person visits                  |                    | 232%                                   | 29.86              | 0.25         | 17.32                 |
| Reminder calls                    |                    | 2,941%                                 | 24.77              | 0.08         | 58.28                 |
| Phone calls                       |                    | 19%                                    | 94.39              | 1.00         | 17.93                 |
| Fasting glucose                   |                    | 99%                                    | 5.62               |              | 5.57                  |
| OGTT                              |                    | 99%                                    | 18.44              |              | 18.27                 |
| Venipuncture                      |                    | 297%                                   | 3.00               |              | 8.92                  |
| Materials                         |                    | 100%                                   | 11.22              |              | 11.22                 |
| Toolbox                           |                    | 100%                                   | 129.32             |              | 129.32                |
| Overhead (69% of personnel)       |                    |                                        |                    |              | 667.42                |
| Total year 1                      |                    |                                        |                    |              | 1,825.93              |
| <b>Year 2 (DPP Year 2)</b>        | 1,039              |                                        |                    |              |                       |
| Supervised activity: care manager |                    | 256%                                   | 29.86              | 1.00         | 76.50                 |
| exercise trainer                  |                    | 171%                                   | 32.99              | 1.00         | 56.35                 |
| Lifestyle group sessions          |                    | 72%                                    | 29.86              | 1.25         | 26.87                 |
| In-person visits                  |                    | 1,233%                                 | 29.86              | 0.58         | 213.54                |
| Reminder calls                    |                    | 266%                                   | 29.86              | 0.25         | 19.86                 |
| Phone calls                       |                    | 1,745%                                 | 24.77              | 0.08         | 34.58                 |
| Fasting glucose                   |                    | 95%                                    | 5.62               |              | 5.34                  |
| OGTT                              |                    | 95%                                    | 18.44              |              | 17.53                 |
| Venipuncture                      |                    | 285%                                   | 3.00               |              | 8.56                  |
| Toolbox                           |                    | 100%                                   | 133.12             |              | 133.12                |
| Overhead (69% of personnel)       |                    |                                        |                    |              | 295.11                |
| Total year 2                      |                    |                                        |                    |              | 887.37                |



SUPPLEMENTARY DATA

|                                   |       |        |        |      |        |
|-----------------------------------|-------|--------|--------|------|--------|
| <b>Year 3 (DPP Year 3)</b>        | 1,020 |        |        |      |        |
| Supervised activity: care manager |       | 256%   | 29.86  | 1.00 | 76.50  |
| exercise trainer                  |       | 171%   | 32.99  | 1.00 | 56.35  |
| Lifestyle group sessions          |       | 72%    | 29.86  | 1.25 | 26.87  |
| In-person visits                  |       | 1,233% | 29.86  | 0.58 | 213.54 |
| Reminder phone calls              |       | 266%   | 29.86  | 0.25 | 19.86  |
| Phone calls                       |       | 1,745% | 24.77  | 0.08 | 34.58  |
| Fasting glucose                   |       | 90%    | 5.62   |      | 5.05   |
| OGTT                              |       | 90%    | 18.44  |      | 16.58  |
| Venipuncture                      |       | 270%   | 3.00   |      | 8.09   |
| Toolbox                           |       | 100%   | 162.28 |      | 162.28 |
| Overhead (69% of personnel)       |       |        |        |      | 295.11 |
| Total year 3                      |       |        |        |      | 914.81 |
|                                   |       |        |        |      |        |
| <b>Year 4 (Bridge)</b>            | 978   |        |        |      |        |
| Closure visit                     |       | 100%   | 30.43  | 1.00 | 30.43  |
| Reminder call for closure visit   |       | 100%   | 24.77  | 0.08 | 1.98   |
| Group lifestyle intervention      |       | 207%   | 9.13   | 1.00 | 18.87  |
| Reminder calls                    |       | 1,600% | 24.77  | 0.08 | 31.71  |
| Phone calls                       |       | 150%   | 5.12   | 0.16 | 1.23   |
| Fasting glucose                   |       | 85%    | 5.62   |      | 4.75   |
| OGTT                              |       | 85%    | 18.44  |      | 15.59  |
| Venipuncture                      |       | 254%   | 3.00   |      | 7.61   |
| Materials                         |       | 27%    | 11.41  |      | 3.10   |
| Overhead (69% of personnel)       |       |        |        |      | 58.11  |
| Total Year 4                      |       |        |        |      | 173.38 |
|                                   |       |        |        |      |        |
| <b>Year 5 (DPPOS Year 1)</b>      | 933   |        |        |      |        |
| Healthy Lifestyle Program (HELP)  |       | 69%    | 13.29  | 1.00 | 9.20   |
| Reminder calls (4 pp*N)           |       | 400%   | 24.77  | 0.08 | 7.93   |
| BOOST                             |       | 119%   | 22.82  | 1.00 | 27.20  |
| Reminder calls                    |       | 200%   | 24.77  | 0.08 | 3.96   |
| Individual counseling             |       | 74%    | 12.68  | 1.00 | 9.45   |
| Phone calls                       |       | 150%   | 5.12   | 0.16 | 1.23   |
| Fasting glucose                   |       | 80%    | 5.62   |      | 4.50   |
| OGTT                              |       | 80%    | 18.44  |      | 14.76  |
| Venipuncture                      |       | 240%   | 3.00   |      | 7.21   |
| Overhead (69% of personnel)       |       |        |        |      | 40.68  |
| Total Year 5                      |       |        |        |      | 126.11 |
|                                   |       |        |        |      |        |

SUPPLEMENTARY DATA

|                                  |     |      |       |      |        |
|----------------------------------|-----|------|-------|------|--------|
|                                  |     |      |       |      |        |
|                                  |     |      |       |      |        |
| <b>Year 6 (DPPOS Year 2)</b>     | 901 |      |       |      |        |
| Healthy Lifestyle Program (HELP) |     | 71%  | 12.43 | 1.00 | 8.86   |
| Reminder calls                   |     | 400% | 24.77 | 0.08 | 7.93   |
| BOOST                            |     | 74%  | 22.82 | 1.00 | 16.94  |
| Reminder calls                   |     | 200% | 24.77 | 0.08 | 3.96   |
| Individual counseling            |     | 100% | 12.68 | 1.00 | 12.68  |
| Phone calls                      |     | 150% | 5.12  | 0.16 | 1.23   |
| Fasting glucose                  |     | 75%  | 5.62  |      | 4.20   |
| OGTT                             |     | 75%  | 18.44 |      | 13.79  |
| Venipuncture                     |     | 224% | 3.00  |      | 6.73   |
| Overhead (69% of personnel)      |     |      |       |      | 35.61  |
| Total Year 6                     |     |      |       |      | 111.94 |
|                                  |     |      |       |      |        |
|                                  |     |      |       |      |        |
| <b>Year 7 (DPPOS Year 3)</b>     | 883 |      |       |      |        |
| Healthy Lifestyle Program (HELP) |     | 84%  | 11.98 | 1.00 | 10.02  |
| Reminder calls                   |     | 400% | 24.77 | 0.08 | 7.93   |
| BOOST                            |     | 95%  | 22.82 | 1.00 | 21.58  |
| Reminder calls                   |     | 200% | 24.77 | 0.08 | 3.96   |
| Individual counseling            |     | 100% | 12.68 | 1.00 | 12.68  |
| Phone calls                      |     | 150% | 5.12  | 0.16 | 1.23   |
| Fasting glucose                  |     | 70%  | 5.62  |      | 3.95   |
| OGTT                             |     | 70%  | 18.44 |      | 12.95  |
| Venipuncture                     |     | 211% | 3.00  |      | 6.32   |
| Incentive                        |     | 100% | 19.02 |      | 19.02  |
| Overhead (69% of personnel)      |     |      |       |      | 39.60  |
| Total Year 7                     |     |      |       |      | 139.23 |
|                                  |     |      |       |      |        |
|                                  |     |      |       |      |        |
| <b>Year 8 (DPPOS Year 4)</b>     | 873 |      |       |      |        |
| Healthy Lifestyle Program (HELP) |     | 73%  | 11.85 | 1.00 | 8.67   |
| Reminder calls                   |     | 400% | 24.77 | 0.08 | 7.93   |
| BOOST                            |     | 99%  | 22.82 | 1.00 | 22.64  |
| Reminder calls                   |     | 200% | 24.77 | 0.08 | 3.96   |
| Individual counseling            |     | 100% | 12.68 | 1.00 | 12.68  |
| Phone calls                      |     | 150% | 5.12  | 0.16 | 1.23   |
| Fasting glucose                  |     | 67%  | 5.62  |      | 3.77   |
| OGTT                             |     | 67%  | 18.44 |      | 12.36  |
| Venipuncture                     |     | 201% | 3.00  |      | 6.03   |

SUPPLEMENTARY DATA

|                                  |     |      |       |      |          |
|----------------------------------|-----|------|-------|------|----------|
| Incentive                        |     | 100% | 19.02 |      | 19.02    |
| Overhead (69% of personnel)      |     |      |       |      | 39.41    |
| Total Year 8                     |     |      |       |      | 137.69   |
|                                  |     |      |       |      |          |
| <b>Year 9 (DPPOS Year 5)</b>     | 855 |      |       |      |          |
| Healthy Lifestyle Program (HELP) |     | 75%  | 12.14 | 1.00 | 9.04     |
| Reminder calls                   |     | 400% | 24.77 | 0.08 | 7.93     |
| BOOST                            |     | 70%  | 22.82 | 1.00 | 15.91    |
| Reminder calls                   |     | 200% | 24.77 | 0.08 | 3.96     |
| Individual counseling            |     | 100% | 12.68 | 1.00 | 12.68    |
| Phone calls                      |     | 150% | 5.12  | 0.16 | 1.23     |
| Fasting glucose                  |     | 65%  | 5.62  |      | 3.63     |
| OGTT                             |     | 65%  | 18.44 |      | 11.93    |
| Venipuncture                     |     | 194% | 3.00  |      | 5.82     |
| Incentive                        |     | 100% | 19.02 |      | 19.02    |
| Overhead (69% of personnel)      |     |      |       |      | 35.02    |
| Total Year 9                     |     |      |       |      | 126.17   |
|                                  |     |      |       |      |          |
| <b>Year 10 (DPPOS Year 6)</b>    | 833 |      |       |      |          |
| Healthy Lifestyle Program (HELP) |     | 68%  | 14.50 | 1.00 | 9.82     |
| Reminder calls                   |     | 400% | 24.77 | 0.08 | 7.93     |
| BOOST                            |     | 78%  | 22.82 | 1.00 | 17.86    |
| Reminder calls                   |     | 200% | 24.77 | 0.08 | 3.96     |
| Individual counseling            |     | 100% | 12.68 | 1.00 | 12.68    |
| Phone calls                      |     | 150% | 5.12  | 0.16 | 1.23     |
| Fasting glucose                  |     | 61%  | 5.62  |      | 3.45     |
| OGTT                             |     | 61%  | 18.44 |      | 11.31    |
| Venipuncture                     |     | 184% | 3.00  |      | 5.52     |
| Incentive                        |     | 100% | 19.02 |      | 19.02    |
| Overhead (69% of personnel)      |     |      |       |      | 36.90    |
| Total Year 10                    |     |      |       |      | 129.68   |
|                                  |     |      |       |      |          |
| <b>Total Years 1-10</b>          |     |      |       |      | 4,572.31 |

SUPPLEMENTARY DATA

**Supplementary Table 2.** Sources of unit costs and their conversion to year 2010 U.S. dollars

| Items                                      | Unit  | Cost (\$)<br>(Mean) | Base year | Multiplier <sup>1</sup><br>(if applicable) | 2010 Cost<br>(\$) | Sources |
|--------------------------------------------|-------|---------------------|-----------|--------------------------------------------|-------------------|---------|
| <b>Direct medical costs</b>                |       |                     |           |                                            |                   |         |
| <i>DPP Personnel</i>                       |       |                     |           |                                            |                   |         |
| Lifestyle case manager <sup>2</sup>        | 1 h   | 23.55               | 2000      | 1.2678                                     | 29.86             | [5, 24] |
| Medication case manager <sup>2</sup>       | 1 h   | 25.24               | 2000      | 1.2678                                     | 32.00             | [5, 24] |
| Exercise trainer <sup>2</sup>              | 1 h   | 26.02               | 2000      | 1.2678                                     | 32.99             | [5, 24] |
| Dietician <sup>2</sup>                     | 1 h   | 26.21               | 2000      | 1.2678                                     | 33.23             | [5, 24] |
| Medical assistant <sup>2</sup>             | 1 h   | 18.14               | 2000      | 1.2678                                     | 23.00             | [5, 24] |
| Secretary <sup>2</sup>                     | 1 h   | 19.54               | 2000      | 1.2678                                     | 24.77             | [5, 24] |
| <i>Materials</i>                           |       |                     |           |                                            |                   |         |
| Educational and training material          |       |                     |           |                                            |                   |         |
| Lifestyle                                  | 1 set | 8.85                | 2000      | 1.2678                                     | 11.22             | [5, 24] |
| Metformin (in addition to placebo)         | 1 set | 0.08                | 2000      | 1.2678                                     | 0.10              | [5, 24] |
| Placebo                                    | 1 set | 2.26                | 2000      | 1.2678                                     | 2.87              | [5, 24] |
| Self monitoring blood glucose <sup>3</sup> |       |                     |           |                                            | 545.58            | [25]    |
| <i>Lab tests and procedures</i>            |       |                     |           |                                            |                   |         |
| Oral glucose tolerance test <sup>4</sup>   | 1     |                     |           |                                            | 18.44             | [26]    |
| Fasting glucose <sup>5</sup>               | 1     |                     |           |                                            | 5.62              | [26]    |
| Exercise stress tests <sup>6</sup>         | 1     |                     |           |                                            | 94.39             | [27]    |
| Venipuncture <sup>7</sup>                  | 1     |                     |           |                                            | 3.00              | [26]    |
| Serum creatinine <sup>8</sup>              | 1     |                     |           |                                            | 7.34              | [26]    |

<sup>1</sup> General Consumer Price Index (CPI) used for inflation unless otherwise noted

<sup>2</sup> Median wage

<sup>3</sup> Annual cost Includes one meter every two years (\$34.38), 400 strips per year (\$470.88), and 400 lancets per year (\$40.32).

<sup>4</sup> Current Procedural Terminology (CPT): 82951, National limit

<sup>5</sup> CPT: 82947, National limit

<sup>6</sup> CPT: 93015

<sup>7</sup> CPT: 36415, Midpoint

<sup>8</sup> CPT: 82565, National limit

SUPPLEMENTARY DATA

|                                                     |               |          |      |        |          |          |
|-----------------------------------------------------|---------------|----------|------|--------|----------|----------|
| Urine creatinine <sup>9</sup>                       | 1             |          |      |        | 7.41     | [26]     |
| Hemoglobin/hemocrit <sup>10</sup>                   | 1             |          |      |        | 6.78     | [26]     |
| HbA <sub>1c</sub> <sup>11</sup>                     | 2/yr          |          |      |        | 27.80    | [26]     |
| Urine albumin-to-creatinine ratio <sup>12</sup>     | 1             |          |      |        | 15.70    | [26]     |
| Lipid panel <sup>13</sup>                           | 1             |          |      |        | 14.20    | [26]     |
| Eye exam - initial exam yr 1 <sup>14</sup>          | 1             |          |      |        | 115.97   | [27]     |
| Eye exam – follow-up yr 2 <sup>15</sup>             | 1             |          |      |        | 62.87    | [27]     |
| <i>Medication</i>                                   |               |          |      |        |          |          |
| Metformin <sup>16</sup>                             | 1 tablet      |          |      |        | 0.15     | [25]     |
| Prescription medications <sup>17</sup>              | 1 year/person | 407.00   | 2000 | 1.4852 | 604.48   | [5, 28]  |
| <i>Bundled medical services</i>                     |               |          |      |        |          |          |
| Hospital days <sup>17</sup>                         | 1             | 1,853.00 | 2007 | 1.1031 | 2,044.04 | [11, 28] |
| Emergency room visits <sup>17</sup>                 | 1             | 696.00   | 2007 | 1.1031 | 767.76   | [11, 28] |
| Urgent care visits <sup>17</sup>                    | 1             | 331.00   | 2007 | 1.1031 | 365.13   | [11, 28] |
| Outpatient visits <sup>17</sup>                     | 1             | 132.00   | 2007 | 1.1031 | 145.61   | [11, 28] |
| Calls to providers                                  | 1             | 20.00    | 2000 | 1.2678 | 25.36    | [5, 24]  |
| <b>Direct nonmedical costs</b>                      |               |          |      |        |          |          |
| <i>Participant time</i>                             |               |          |      |        |          |          |
| Travel time                                         | 1 h           | 22.30    | 2009 | 1.0182 | 22.71    | [24, 29] |
| People who dislike exercise                         | 1 h           | 22.30    | 2009 | 1.0182 | 22.71    | [24, 29] |
| People who are neutral about exercise <sup>18</sup> | 1 h           | 11.15    | 2009 | 1.0182 | 11.35    | [24, 29] |
| People who like exercise                            | 1 h           | 0.00     | 2009 | 1.0182 | 0.00     | [24, 29] |

<sup>9</sup> CPT: 82570, National limit

<sup>10</sup> CPT: 85014, 85018, National limit

<sup>11</sup> CPT: 83036, National limit. Cost is \$13.90 per HbA<sub>1c</sub> test.

<sup>12</sup> CPT: 82570, 82043, National limit

<sup>13</sup> CPT: 80061, National limit

<sup>14</sup> CPT: 92004

<sup>15</sup> CPT: 92012

<sup>16</sup> 2010 Red Book, Medicaid upper limit. For sensitivity analyses, average cost for all manufacturers \$1.14.

<sup>17</sup> Estimate from reference 5. Updated with Medical CPI

<sup>18</sup> Half average wage

SUPPLEMENTARY DATA

|                                |          |          |      |        |          |          |
|--------------------------------|----------|----------|------|--------|----------|----------|
| Shopping and cooking           | 1 h      | 22.30    | 2009 | 1.0182 | 22.71    | [24, 29] |
| <i>Services</i>                |          |          |      |        |          |          |
| Exercise classes               | 1 week   | 16.60    | 2000 | 1.2678 | 21.05    | [5, 24]  |
| Health club                    | 3 years  | 2,305.00 | 2000 | 1.2678 | 2,922.28 | [5, 24]  |
| Personal trainer               | 1 h      | 34.00    | 2000 | 1.2678 | 43.11    | [5, 24]  |
| Commercial weight loss classes | 1 month  | 46.00    | 2000 | 1.2678 | 58.32    | [5, 24]  |
| <i>Fitness equipment</i>       |          |          |      |        |          |          |
| Exercise shoes                 | 1 pair   | 73.27    | 2000 | 1.2678 | 92.89    | [5, 24]  |
| Bicycle                        | 1        | 430.40   | 2000 | 1.2678 | 545.66   | [5, 24]  |
| Exercise videos                | 1        | 15.02    | 2000 | 1.2678 | 19.04    | [5, 24]  |
| Free weights                   | 2        | 39.06    | 2000 | 1.2678 | 49.52    | [5, 24]  |
| Golf clubs                     | 1 set    | 390.61   | 2000 | 1.2678 | 495.22   | [5, 24]  |
| Home gym                       | 1        | 683.57   | 2000 | 1.2678 | 866.63   | [5, 24]  |
| Stationary bike                | 1        | 548.80   | 2000 | 1.2678 | 695.77   | [5, 24]  |
| Step                           | 1 system | 78.12    | 2000 | 1.2678 | 99.04    | [5, 24]  |
| Treadmill                      | 1        | 1,100.00 | 2000 | 1.2678 | 1,394.58 | [5, 24]  |
| <i>Food equipment</i>          |          |          |      |        |          |          |
| Air popper                     | 1        | 25.39    | 2000 | 1.2678 | 32.19    | [5, 24]  |
| Blender                        | 1        | 39.70    | 2000 | 1.2678 | 50.33    | [5, 24]  |
| Cookbooks                      | 1        | 25.39    | 2000 | 1.2678 | 32.19    | [5, 24]  |
| Food scale                     | 1        | 24.41    | 2000 | 1.2678 | 30.95    | [5, 24]  |
| Freezer                        | 1        | 449.54   | 2000 | 1.2678 | 569.93   | [5, 24]  |
| Microwave                      | 1        | 155.04   | 2000 | 1.2678 | 196.56   | [5, 24]  |
| Mixer                          | 1        | 132.46   | 2000 | 1.2678 | 167.93   | [5, 24]  |
| Steamer                        | 1        | 31.01    | 2000 | 1.2678 | 39.31    | [5, 24]  |
| Wok                            | 1 set    | 206.10   | 2000 | 1.2678 | 261.29   | [5, 24]  |
| <i>Food costs</i>              |          |          |      |        |          |          |
| Food at home                   | 1 year   | 2,061.00 | 2009 | 1.0182 | 2,098.51 | [24, 30] |
| Food away from home            | 1 year   | 1,868.00 | 2009 | 1.0182 | 1,902.00 | [24, 30] |
| <i>Transportation costs</i>    | 1 mile   |          |      |        | 0.50     | [31]     |

SUPPLEMENTARY DATA

|                                                                   |        |        |      |        |        |              |
|-------------------------------------------------------------------|--------|--------|------|--------|--------|--------------|
| <b>Indirect costs</b>                                             |        |        |      |        |        |              |
| Time lost from doing usual activity due to morbidity or mortality | 1 day  | 129.64 | 2007 | 1.0529 | 136.50 | [24, 32]     |
| <i>Time costs associated with outpatient visits</i>               |        |        |      |        |        |              |
| Travel to and from visits                                         | 0.5800 | 22.30  | 2009 | 1.0182 | 13.17  | [24, 29, 33] |
| Waiting for services                                              | 0.7000 | 22.30  | 2009 | 1.0182 | 15.89  | [24, 29, 33] |
| Receiving services                                                | 1.2300 | 22.30  | 2009 | 1.0182 | 27.93  | [24, 29, 33] |
| Calls to providers                                                | 0.1667 | 22.30  | 2009 | 1.0182 | 3.79   | [5, 24, 29]  |
| <i>Time costs associated with emergency department visits</i>     |        |        |      |        |        |              |
| Time spent in the emergency department                            | 3.5667 | 22.30  | 2009 | 1.0182 | 80.98  | [24, 29, 34] |

SUPPLEMENTARY DATA

**Supplementary Table 3.** Undiscounted per capita direct medical costs of care outside the DPP/DPPOS and health utility scores by intervention group, study year, and diabetes status

| Number of participants by diabetes status, intervention group and study year |             |           |         |           |           |         |                  |           |         |
|------------------------------------------------------------------------------|-------------|-----------|---------|-----------|-----------|---------|------------------|-----------|---------|
|                                                                              | Nondiabetic |           |         | Diabetic  |           |         | Total            |           |         |
| Study Yr                                                                     | Lifestyle   | Metformin | Placebo | Lifestyle | Metformin | Placebo | Lifestyle        | Metformin | Placebo |
| Baseline                                                                     | 1,079       | 1,073     | 1,082   | 0         | 0         | 0       | 1,079            | 1,073     | 1,082   |
| 1                                                                            | 1,069       | 1,062     | 1,043   | 10        | 11        | 39      | 1,079            | 1,073     | 1,082   |
| 2                                                                            | 988         | 944       | 889     | 51        | 98        | 155     | 1,039            | 1,042     | 1,044   |
| 3                                                                            | 917         | 837       | 772     | 103       | 175       | 255     | 1,020            | 1,012     | 1,027   |
| 4                                                                            | 827         | 736       | 679     | 151       | 247       | 311     | 978              | 983       | 990     |
| 5                                                                            | 747         | 663       | 605     | 186       | 278       | 341     | 933              | 941       | 946     |
| 6                                                                            | 674         | 619       | 567     | 227       | 287       | 356     | 901              | 906       | 923     |
| 7                                                                            | 620         | 576       | 524     | 263       | 314       | 379     | 883              | 890       | 903     |
| 8                                                                            | 585         | 536       | 491     | 288       | 341       | 401     | 873              | 877       | 892     |
| 9                                                                            | 553         | 500       | 451     | 302       | 363       | 423     | 855              | 863       | 874     |
| 10                                                                           | 511         | 466       | 416     | 322       | 377       | 439     | 833              | 843       | 855     |
|                                                                              |             |           |         |           |           |         |                  |           |         |
|                                                                              |             |           |         |           |           |         |                  |           |         |
|                                                                              |             |           |         |           |           |         |                  |           |         |
| Direct Medical Costs of Care Outside the DPP/DPPOS                           |             |           |         |           |           |         |                  |           |         |
|                                                                              | Nondiabetic |           |         | Diabetic  |           |         | Weighted average |           |         |
| Study Yr                                                                     | Lifestyle   | Metformin | Placebo | Lifestyle | Metformin | Placebo | Lifestyle        | Metformin | Placebo |
| 1                                                                            | \$1,795     | \$1,935   | \$1,978 | \$5,799   | \$5,350   | \$2,705 | \$1,832          | \$1,970   | \$2,004 |
| 2                                                                            | \$2,258     | \$2,289   | \$2,106 | \$3,389   | \$2,637   | \$3,724 | \$2,314          | \$2,322   | \$2,346 |
| 3                                                                            | \$2,020     | \$2,243   | \$2,431 | \$3,808   | \$3,290   | \$3,638 | \$2,201          | \$2,424   | \$2,731 |
| 4                                                                            | \$2,271     | \$2,329   | \$2,490 | \$3,626   | \$3,055   | \$3,693 | \$2,480          | \$2,512   | \$2,868 |
| 5                                                                            | \$2,040     | \$2,151   | \$2,337 | \$3,328   | \$3,078   | \$3,339 | \$2,297          | \$2,425   | \$2,698 |
| 6                                                                            | \$2,542     | \$2,463   | \$2,582 | \$3,446   | \$4,525   | \$3,527 | \$2,770          | \$3,116   | \$2,946 |
| 7                                                                            | \$2,416     | \$2,672   | \$2,422 | \$3,721   | \$3,732   | \$3,775 | \$2,804          | \$3,046   | \$2,990 |
| 8                                                                            | \$2,855     | \$2,520   | \$2,657 | \$4,923   | \$4,003   | \$4,018 | \$3,537          | \$3,097   | \$3,269 |



SUPPLEMENTARY DATA

|                       |           |             |          |           |           |          |           |                  |          |
|-----------------------|-----------|-------------|----------|-----------|-----------|----------|-----------|------------------|----------|
| 9                     | \$2,553   | \$2,828     | \$2,952  | \$4,064   | \$3,691   | \$4,100  | \$3,087   | \$3,191          | \$3,507  |
| 10                    | \$3,099   | \$2,903     | \$2,757  | \$4,105   | \$3,750   | \$4,493  | \$3,488   | \$3,282          | \$3,648  |
|                       |           |             |          |           |           |          |           |                  |          |
| Total                 | \$23,849  | \$24,333    | \$24,711 | \$40,209  | \$37,113  | \$37,010 | \$26,810  | \$27,384         | \$29,007 |
|                       |           |             |          |           |           |          |           |                  |          |
|                       |           |             |          |           |           |          |           |                  |          |
|                       |           |             |          |           |           |          |           |                  |          |
| Health Utility Scores |           |             |          |           |           |          |           |                  |          |
|                       |           |             |          |           |           |          |           |                  |          |
|                       |           | Nondiabetic |          |           | Diabetic  |          |           | Weighted average |          |
| Study Yr              | Lifestyle | Metformin   | Placebo  | Lifestyle | Metformin | Placebo  | Lifestyle | Metformin        | Placebo  |
| 1                     | 0.703     | 0.688       | 0.689    | 0.665     | 0.717     | 0.688    | 0.703     | 0.688            | 0.689    |
| 2                     | 0.698     | 0.683       | 0.677    | 0.644     | 0.681     | 0.681    | 0.695     | 0.683            | 0.678    |
| 3                     | 0.695     | 0.682       | 0.678    | 0.665     | 0.685     | 0.663    | 0.692     | 0.683            | 0.674    |
| 4                     | 0.695     | 0.681       | 0.676    | 0.652     | 0.677     | 0.669    | 0.688     | 0.680            | 0.674    |
| 5                     | 0.688     | 0.682       | 0.675    | 0.659     | 0.668     | 0.669    | 0.682     | 0.678            | 0.673    |
| 6                     | 0.689     | 0.679       | 0.679    | 0.675     | 0.667     | 0.659    | 0.685     | 0.675            | 0.671    |
| 7                     | 0.690     | 0.686       | 0.677    | 0.677     | 0.668     | 0.665    | 0.686     | 0.680            | 0.672    |
| 8                     | 0.689     | 0.681       | 0.675    | 0.669     | 0.666     | 0.666    | 0.682     | 0.675            | 0.671    |
| 9                     | 0.693     | 0.676       | 0.670    | 0.677     | 0.664     | 0.663    | 0.687     | 0.671            | 0.667    |
| 10                    | 0.689     | 0.678       | 0.678    | 0.678     | 0.672     | 0.658    | 0.685     | 0.675            | 0.668    |
|                       |           |             |          |           |           |          |           |                  |          |
| Mean                  | 0.693     | 0.682       | 0.677    | 0.666     | 0.677     | 0.668    | 0.689     | 0.679            | 0.674    |

SUPPLEMENTARY DATA

**Supplementary Table 4.** Undiscounted per capita 10-year direct nonmedical costs by intervention group and type (\$)

|                                        | <b>Lifestyle</b> | <b>Metformin</b> | <b>Placebo</b> |
|----------------------------------------|------------------|------------------|----------------|
| <b>Diet-related costs</b>              |                  |                  |                |
| Food eaten at home                     | 21,558           | 21,522           | 21,574         |
| Food eaten away from home              | 18,516           | 18,769           | 18,702         |
| Commercial weight loss programs        | 442              | 540              | 523            |
| Food preparation equipment             | 626              | 566              | 563            |
|                                        |                  |                  |                |
| Total                                  | 41,142           | 41,398           | 41,362         |
|                                        |                  |                  |                |
| <b>Physical activity-related costs</b> |                  |                  |                |
| Gym membership                         | 1,527            | 1,287            | 1,281          |
| Exercise classes                       | 885              | 722              | 854            |
| Personal trainer                       | 42               | 38               | 37             |
| Fitness equipment                      | 3,802            | 2,831            | 2,976          |
|                                        |                  |                  |                |
| Total                                  | 6,255            | 4,878            | 5,149          |
|                                        |                  |                  |                |
| <b>Transportation-related costs</b>    |                  |                  |                |
| Travel to study visits                 | 834              | 341              | 139            |
| Travel to medical visits               | 584              | 599              | 620            |
|                                        |                  |                  |                |
| Total                                  | 1,418            | 940              | 759            |
|                                        |                  |                  |                |
| <b>Participant time-related costs</b>  |                  |                  |                |
| Intervention-related time              | 3,051            | 1,073            | 587            |
| Medical care-related time              | 3,837            | 3,909            | 4,056          |
| Time spent shopping and cooking        | 81,843           | 81,466           | 84,267         |
| Adjusted time spent exercising*        | 9,384            | 9,841            | 9,945          |
|                                        |                  |                  |                |
| Total                                  | 98,115           | 96,289           | 98,855         |
|                                        |                  |                  |                |
| <b>TOTAL</b>                           | <b>146,930</b>   | <b>143,504</b>   | <b>146,124</b> |

\* see text of description of adjustment

## SUPPLEMENTARY DATA

### **Pennington Biomedical Research Center (Baton Rouge, LA)**

George A. Bray, MD\*  
Annie Chatellier, RN, CCRC\*\*  
Crystal Duncan, LPN  
Frank L. Greenway, MD  
Erma Levy, RD  
Donna H. Ryan, MD

### **University of Chicago (Chicago, IL)**

Kenneth S. Polonsky, MD\*  
Janet Tobian, MD, PhD\*  
David Ehrmann, MD\*  
Margaret J. Matulik, RN, BSN\*\*  
Bart Clark, MD  
Kirsten Czech, MS  
Catherine DeSandre, BA  
Ruthanne Hilbrich, RD  
Wylie McNabb, EdD  
Ann R. Semenske, MS, RD

### **Jefferson Medical College (Philadelphia, PA)**

Barry J. Goldstein, MD, PhD\*  
Kevin Furlong, DO\*  
Kellie A. Smith, RN, MSN\*\*  
Wendi Wildman, RN\*\*  
Constance Pepe, MS, RD

### **University of Miami (Miami, FL)**

Ronald B. Goldberg, MD\*  
Jeanette Calles, MSED\*\*  
Juliet Ojito, RN\*\*  
Sumaya Castillo-Florez, MPH  
Hermes J. Florez, MD, PhD  
Anna Giannella, RD, MS  
Olga Lara  
Beth Veciana

### **The University of Texas Health Science Center (San Antonio, TX)**

Steven M. Haffner, MD, MPH\*  
Helen P. Hazuda, PhD\*  
Maria G. Montez, RN, MSHP, CDE\*\*  
Carlos Lorenzo, MD, PhD  
Arlene Martinez, RN, BSN, CDE

### **University of Colorado (Denver, CO)**

Richard F. Hamman, MD, DrPH\*  
Lisa Testaverde, MS\*\*  
Alexis Bouffard, MA, RN, BSN  
Dana Dabelea, MD, PhD  
Tonya Jenkins, RD, CDE  
Dione Lenz, RN, BSN, CDE

Leigh Perreault, MD  
David W. Price, MD  
Sheila C. Steinke, MS

### **Joslin Diabetes Center (Boston, MA)**

Edward S. Horton, MD\*  
Catherine S. Poirier, RN, BSN\*\*  
Kati Swift, RN, BSN\*\*  
Enrique Caballero, MD  
Sharon D. Jackson, MS, RD, CDE  
Lori Lambert, MS, RD, LD  
Kathleen E. Lawton, RN  
Sarah Ledbury, Med, RD

### **VA Puget Sound Health Care System and University of Washington (Seattle, WA)**

Steven E. Kahn, MB, ChB\*  
Brenda K. Montgomery, RN, BSN, CDE\*\*  
Wilfred Fujimoto, MD  
Robert H. Knopp, MD  
Edward W. Lipkin, MD  
Michelle Marr, BA  
Anne Murillo, BS  
Dace Trence, MD

### **University of Tennessee (Memphis, TN)**

Abbas E. Kitabchi, PhD, MD, FACP\*  
Mary E. Murphy, RN, MS, CDE, MBA\*\*  
William B. Applegate, MD, MPH  
Michael Bryer-Ash, MD

### **Samuel Dagogo-Jack, MD, MSc, FRCP, FACP**

Sandra L. Frieson, RN  
Helen Lambeth, RN, BSN  
Lynne C. Lichtermann, RN, BSN  
Hooman Otkaei, MD  
Lily M.K. Rutledge, RN, BSN  
Amy R. Sherman, RD, LD  
Clara M. Smith, RD, MHP, LDN  
Judith E. Soberman, MD  
Beverly Williams-Cleaves, MD

### **Northwestern University's Feinberg School of Medicine (Chicago, IL)**

Boyd E. Metzger, MD\*  
Mark E. Molitch, MD\*  
Mariana K. Johnson, MS, RN\*\*  
Mimi M. Giles, MS, RD  
Diane Larsen, BS  
Charlotte Niznik, MS, RN, CDE  
Samsam C. Pen, BA  
Pamela A. Schinleber, RN, MS

SUPPLEMENTARY DATA

**Massachusetts General Hospital (Boston, MA)**

David M. Nathan, MD\*  
Charles McKittrick, BSN\*\*  
Heather Turgeon, BSN\*\*  
Kathy Abbott  
Ellen Anderson, MS, RD  
Laurie Bissett, MS, RD  
Enrico Cagliero, MD  
Kali D'Anna  
Linda Delahanty, MS, RD  
Jose C. Florez, MD, PhD<sup>†</sup>  
Valerie Goldman, MS, RD  
Alexandra Poulos  
Beverly Tseng

**University of California-San Diego (San Diego, CA)**

Elizabeth Barrett-Connor, MD\*  
Mary Lou Carrion-Petersen, RN, BSN\*\*  
Javiva Horne, RD  
Diana Leos, RN, BSN  
Sundar Mudaliar, MD  
Jean Smith, RN  
Karen Vejvoda, RN, BSN, CDE, CCRC

**St. Luke's-Roosevelt Hospital (New York, NY)**

F. Xavier Pi-Sunyer, MD\*  
Jane E. Lee, MS\*\*  
Sandra T. Foo, MD  
Susan Hagamen, MS, RN, CDE

**Indiana University (Indianapolis, IN)**

David G. Marrero, PhD\*  
Susie M. Kelly, RN, CDE\*\*  
Ronald T. Ackermann, MD  
Edwin S. Fineberg, MD  
Angela Hadden  
Marcia A. Jackson  
Marion S. Kirkman, MD  
Kieren J. Mather, MD  
Paris J. Roach, MD  
Madelyn L. Wheeler, RD

**Medstar Research Institute (Washington, DC)**

Robert E. Ratner, MD\*  
Vanita Aroda, MD\*  
Sue Shapiro, RN, BSN, CCRC\*\*  
Catherine Bavido-Arrage, MS, RD, LD  
Peggy Gibbs  
Gabriel Uwaifo, MD  
Renee Wiggins, RD

**University of Southern California/UCLA Research Center (Alhambra, CA)**

Mohammed F. Saad, MD\*  
Karol Watson, MD\*  
Medhat Botrous, MD\*\*  
Sujata Jinagouda, MD\*\*  
Maria Budget  
Claudia Conzues  
Perpetua Magpuri  
Kathy Ngo  
Kathy Xapthalamous

**Washington University (St. Louis, MO)**

Neil H. White, MD, CDE\*  
Samia Das, MS, MBA, RD, LD\*\*  
Ana Santiago, RD  
Angela L. Brown, MD  
Cormarie Wernimont, RD, LD

**Johns Hopkins School of Medicine (Baltimore, MD)**

Christopher D. Saudek, MD\* (deceased)  
Sherita Hill Golden, MD, MHS, FAHA\*  
Tracy Whittington, BS\*\*  
Jeanne M. Clark, MD  
Alicia Greene  
Dawn Jiggetts  
Henry Mosley  
John Reusing  
Richard R. Rubin, PhD  
Shawne Stephens  
Evonne Utsey

**University of New Mexico (Albuquerque, NM)**

David S. Schade, MD\*  
Karwyn S. Adams, RN, MSN\*\*  
Claire Hemphill, RN, BSN\*\*  
Penny Hyde, RN, BSN\*\*  
Lisa Butler, BUS  
Janene L. Canady, RN, CDE  
Kathleen Colleran, MD  
Ysela Gonzales, RN, MSN  
Doris A. Hernandez-McGinnis  
Patricia Katz, LPN  
Carolyn King

**Albert Einstein College of Medicine (Bronx, NY)**

Jill Crandall, MD\*  
Janet O. Brown, RN, MPH, MSN\*\*  
Elsie Adorno, BS  
Helena Duffy, MS, C-ANP  
Helen Martinez, RN, MSN, FNP-C  
Dorothy Pompei, BA

## SUPPLEMENTARY DATA

Harry Shamoon, MD  
Elizabeth A. Walker, RN, DNSc, CDE  
Judith Wylie-Rosett, EdD, RD  
**University of Pittsburgh (Pittsburgh, PA)**  
Trevor Orchard, MD\*  
Susan Jeffries, RN, MSN\*\*  
M. Kaye Kramer, BSN, MPH\*\*  
Marie Smith, RN, BSN\*\*  
Rena R. Wing, PhD  
Andrea Kriska, PhD  
Jessica Pettigrew, CMA  
Linda Semler, MS, RD  
Elizabeth Venditti, PhD  
Valarie Weinzierl, BS  
**University of Hawaii (Honolulu, HI)**  
Richard F. Arakaki, MD\*  
Narleen K. Baker-Ladao, BS\*\*  
Mae K. Isonaga, RD, MPH\*\*  
Nina E. Bermudez, MS  
Marjorie K. Mau, MD  
**Southwest American Indian Centers**  
**(Phoenix, AZ; Shiprock, NM; Zuni, NM)**  
William C. Knowler, MD, DrPH\*<sup>+</sup>  
Norman Coeoyate\*\*  
Mary A. Hoskin, RD, MS\*\*  
Camille Natewa\*\*  
Carol A. Percy, RN, MS\*\*  
Kelly J. Acton, MD, MPH  
Vickie L. Andre, RN, FNP  
Shandiin Begay, MPH  
Brian C. Bucca, OD, FAAO  
Sherron Cook  
Matthew S. Doughty, MD  
Justin Glass, MD  
Martia Glass, MD  
Robert L. Hanson, MD, MPH  
Doug Hassenpflug, OD  
Louise E. Ingraham, MS, RD, LN  
Kathleen M. Kobus, RNC-ANP  
Jonathan Krakoff, MD  
Catherine Manus, LPN  
Cherie McCabe  
Sara Michaels, MD  
Tina Morgan  
Julie A. Nelson, RD  
Robert J. Roy  
Miranda Smart  
Darryl P. Tonemah, PhD  
Charlton Wilson, MD

**George Washington University Biostatistics**  
**Center (DPP Coordinating Center**  
**Rockville, MD)**  
Sarah Fowler, PhD\*  
Tina Brenneman\*\*  
Solome Abebe, MS  
Julie Bamdad, MS  
Melanie Barkalow  
Joel Bethupu  
Tsedenia Bezabeh  
Jackie Callaghan  
Costas Christophi, PhD  
Sharon L. Edelstein, ScM  
Yuping Gao  
Robert Gooding  
Adrienne Gottlieb  
Nisha Grover  
Heather Hoffman, PhD  
Kathleen Jablonski, PhD  
Richard Katz, MD  
Preethy Kolinjivadi, MS  
John M. Lachin, ScD  
Yong Ma, PhD  
Susan Reamer  
Alla Sapozhnikova  
Hanna Sherif, MS  
Marinella Temprosa, MS  
Qing Pan, PhD  
Mary Foulkes, PhD  
Nicole Butler  
**Lifestyle Resource Core**  
Elizabeth M. Venditti, PhD\*  
Andrea M. Kriska, PhD  
Linda Semler, MS, RD  
Valerie Weinzierl, BS  
**Central Biochemistry Laboratory (Seattle,**  
**WA)**  
Santica Marcovina, PhD, ScD\*  
Greg Strylewicz, PhD\*\*  
John Albers, PhD  
**Epidemiological Cardiology Research**  
**Center- Epicare (Winston-Salem, NC)**  
Ronald J. Prineas, MD, PhD\*  
Teresa Alexander  
Charles Campbell, MS  
Sharon Hall  
Susan Hensley  
Yabing Li, MD  
Margaret Mills  
Elsayed Soliman, MD  
Zhuming Zhang, MD

## SUPPLEMENTARY DATA

### NIH/NIDDK (Bethesda, MD)

Judith Fradkin, MD

Sanford Garfield, PhD

### Centers for Disease Control & Prevention (Atlanta, GA)

Edward Gregg, PhD

Ping Zhang, PhD

### University of Michigan (Ann Arbor, MI)

William H. Herman, MD, MPH

Morton B. Brown, PhD

\* denotes Principal Investigator

\*\* denotes Program Coordinator

## References

24. Bureau of Labor Statistics. Inflation Calculator. 2010 October 14, 2010; Available from: [http://www.bls.gov/data/inflation\\_calculator.htm](http://www.bls.gov/data/inflation_calculator.htm).
25. PDR Network, Red Book. 2010, Montvale, NJ.
26. Centers for Medicare and Medicaid Services. Clinical Laboratory Fee Schedule, April Release. 2010 October 13, 2010; Available from: [http://www.cms.gov/ClinicalLabFeeSched/02\\_clinlab.asp#TopOfPage](http://www.cms.gov/ClinicalLabFeeSched/02_clinlab.asp#TopOfPage).
27. Centers for Medicare and Medicaid Services. National Physician Fee Schedule Relative Value File, October Release. 2010 October 12, 2010; RVU10D\_PCT22; Available from: <http://www.cms.gov/PhysicianFeeSched/PFSRVF/list.asp?listpage=4>.
28. Bureau of Labor Statistics. Consumer Price Index- All Urban Consumers. 2010 October 7, 2010; Available from: <http://www.bls.gov/data/#calculators>.
29. Bureau of Labor Statistics. National Compensation Survey: Occupational Earnings in the United States, 2009. 2010 October 8, 2010; Bulletin 2738; Available from: <http://www.bls.gov/ncs/ocs/sp/nctb1344.pdf>.
30. United States Department of Agriculture. Food CPI and Expenditures: Table 13. 2010 November 10, 2010; Available from: [http://www.ers.usda.gov/briefing/CPIFoodandExpenditures/Data/Expenditures\\_tables/table13.htm](http://www.ers.usda.gov/briefing/CPIFoodandExpenditures/Data/Expenditures_tables/table13.htm).
31. Internal Revenue Service, Revenue Procedure 2009-54. 2009.
32. Grosse SD, Krueger KV, Mvundura M. Economic productivity by age and sex: 2007 estimates for the United States. *Med Care* 2009;47(Suppl 1):S94–S103
33. Russell L, Ibuka Y, Carr D. How Much Time Do Patients Spend on Outpatient Visits? The American Time Use Survey. *Patient* 2008;1:211–222
34. Niska R, Bhuiya F, Xu J. National Hospital Ambulatory Medical Care Survey: 2007 emergency department summary. *Natl Health Stat Report* (26):1-31. Available from: <http://www.cdc.gov/nchs/data/nhsr/nhsr026.pdf>.
